# Supplementary material for: Disruption of the NF-κB/IL-8 Signaling Axis by Sulconazole Inhibits Human Breast Cancer Stem Cell Formation
Source: PubMed Central journal article supplement (PMC6770215; doi:10.3390/cells8091007), 2019-08-30
Supplement: cells-08-01007-s001.pdf [file cells-08-01007-s001.pdf]

Table S1. Specific primer sequence of Real-time RT-qPCR

| <b>Genes</b>                    | <b>Primers</b>                                                                    |
|---------------------------------|-----------------------------------------------------------------------------------|
| <b>CD44</b>                     | Forward: 5'-AGAAGGTGTGGGCAGAAGAA-3'<br>Reverse: 5'-AAATGCACCATTTCTGAGA-3'         |
| <b>Nanog</b>                    | Forward: 5'-ATGCCTCACACGGAGACTGT-3'<br>Reverse: 5'-AAGTGGGTTGTTTGCCTTTG-3'        |
| <b>C-myc</b>                    | Forward: 5'-AATGAAAAGGCCCCCAAGGTAGTTATCC-3'<br>Reverse : 5'-AGCAAAACCCGGAGGAGT-3' |
| <b><math>\beta</math>-actin</b> | Forward: 5'-TGTTACCAACTGGGACGACA-3'<br>Reverse : 5'-GGGGTGTTGAAGGTCTCAA-3'        |
